# Supplementary material for: S-nitrosothiols loaded mini-sized Au@silica nanorod elicits collagen depletion and mitochondrial damage in solid tumor treatment
Source: PubMed Central journal article supplement (PMC7295055; doi:10.7150/thno.42661), 2020-05-20
Supplement: thnov10p6774s1.pdf [file thnov10p6774s1.pdf]

## Supporting Information

### **S-nitrosothiols loaded mini-sized Au@silica nanorod elicits collagen depletion and mitochondrial damage in solid tumor treatment**

Ping Liu<sup>1</sup>, Yidan Wang<sup>1</sup>, Yang Liu<sup>3</sup>, Fengping Tan<sup>1</sup>, Jining Li<sup>2</sup>✉ and Nan Li<sup>1</sup>✉

1. Tianjin Key Laboratory of Drug Delivery & High-Efficiency, School of Pharmaceutical Science and Technology, Tianjin University, 300072, Tianjin, P. R. China.
2. School of Precision Instrument and Opto-Electronics Engineering, Tianjin University, 300072, Tianjin, P. R. China.
3. Department of Orthopedic Surgery, Tianjin Medical University General Hospital, 300052, Tianjin, P. R. China

✉ Corresponding authors: Email: [linan19850115@163.com](mailto:linan19850115@163.com) (N. Li); [jiningli@tju.edu.cn](mailto:jiningli@tju.edu.cn) (J. Li).

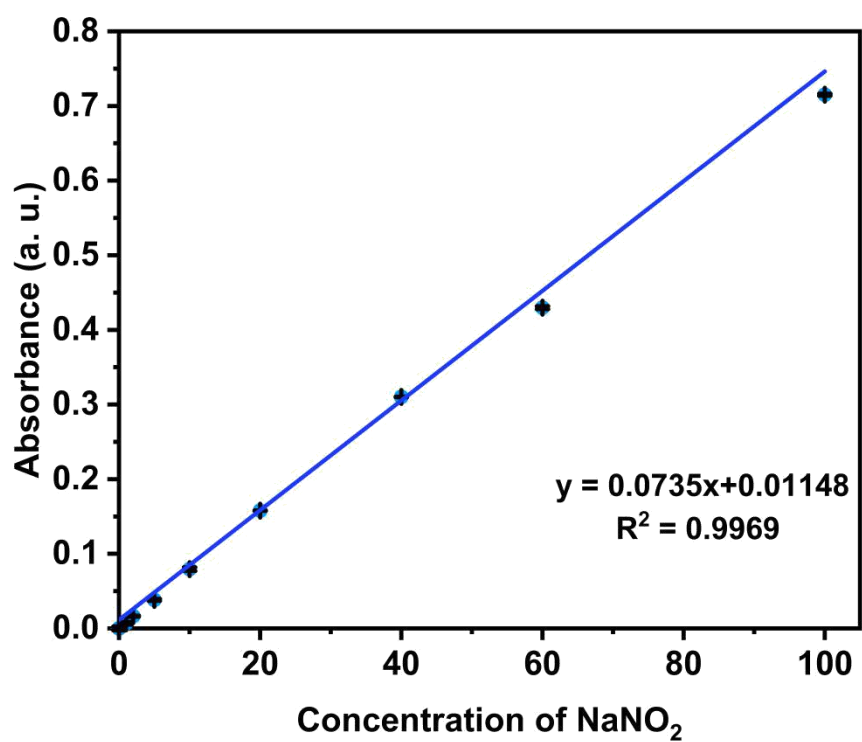

**Figure S1.** Standard curve of NaNO<sub>2</sub> standard samples (0-100 μM).

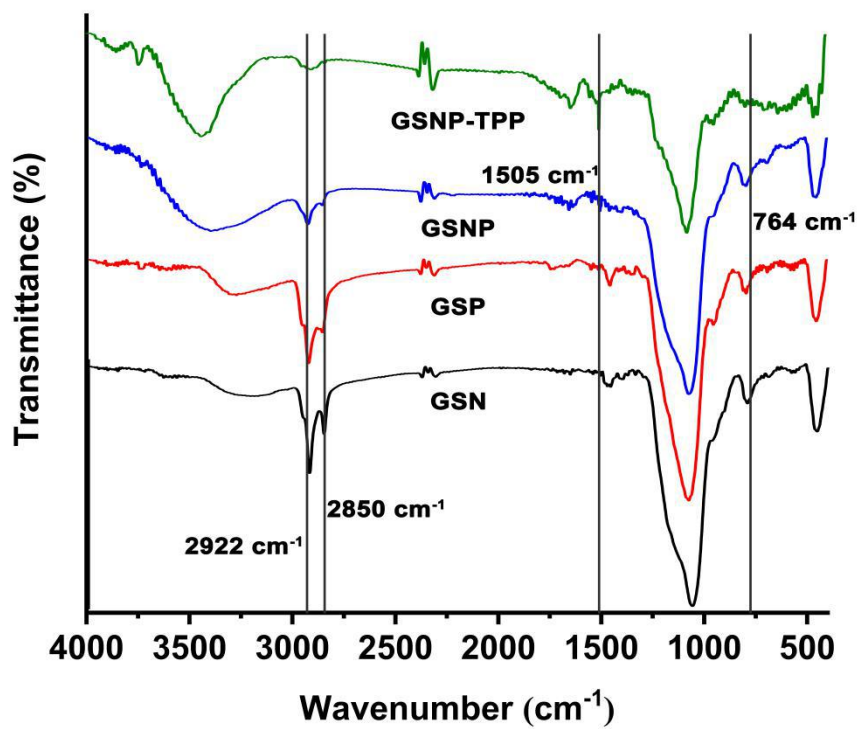

**Figure S2.** FTIR spectra of GSN (black), GSP (red), GSNP (blue) and GSNP-TPP (green).

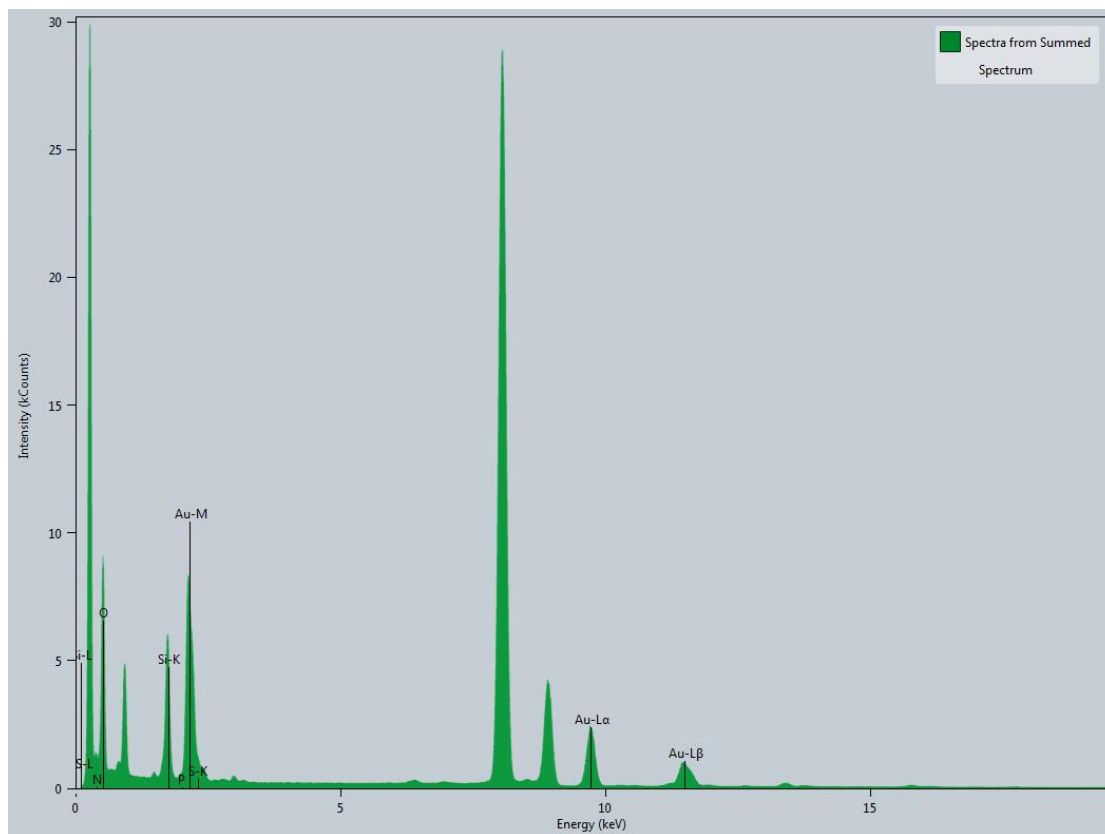

**Figure S3.** EDS spectra of GSNP-TPP.

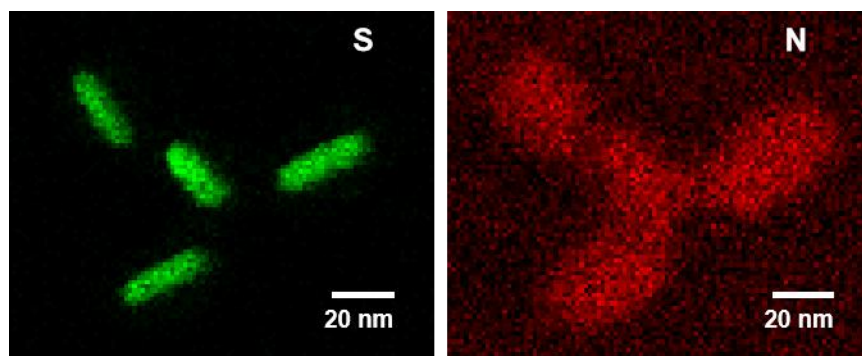

**Figure S4.** Elemental mapping analysis of S and N in GSNP-TPP.

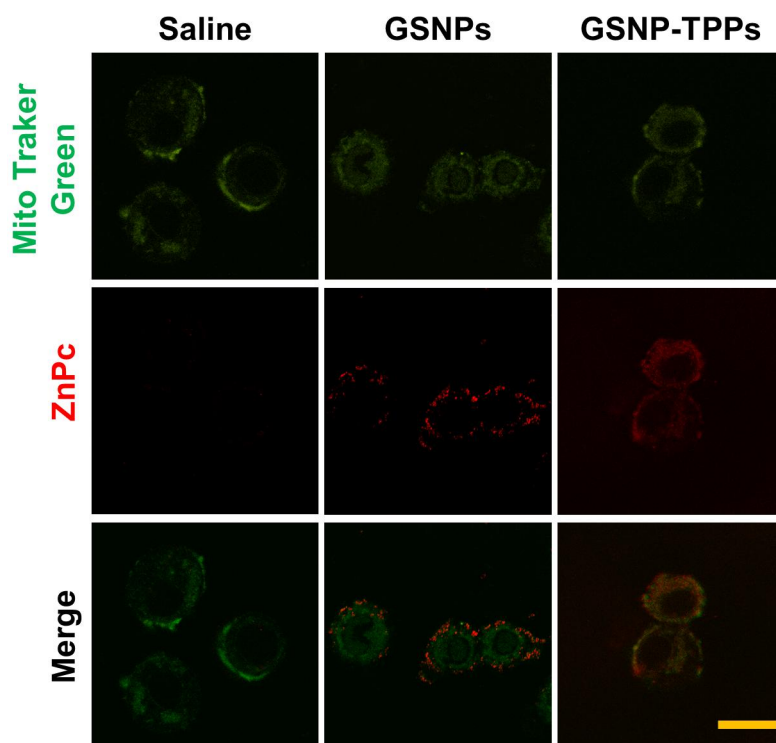

**Figure S5.** Confocal microscopy images of HeLa cells treated with saline, GSNPs and GSNP-TPPs. GSNPs and GSNP-TPPs were labeled with ZnPc and emitted red fluorescence. Mitochondria were stained by 50 nM Mito-Tracker Green and emitted green fluorescence. Scale bar indicated 25  $\mu\text{m}$ .

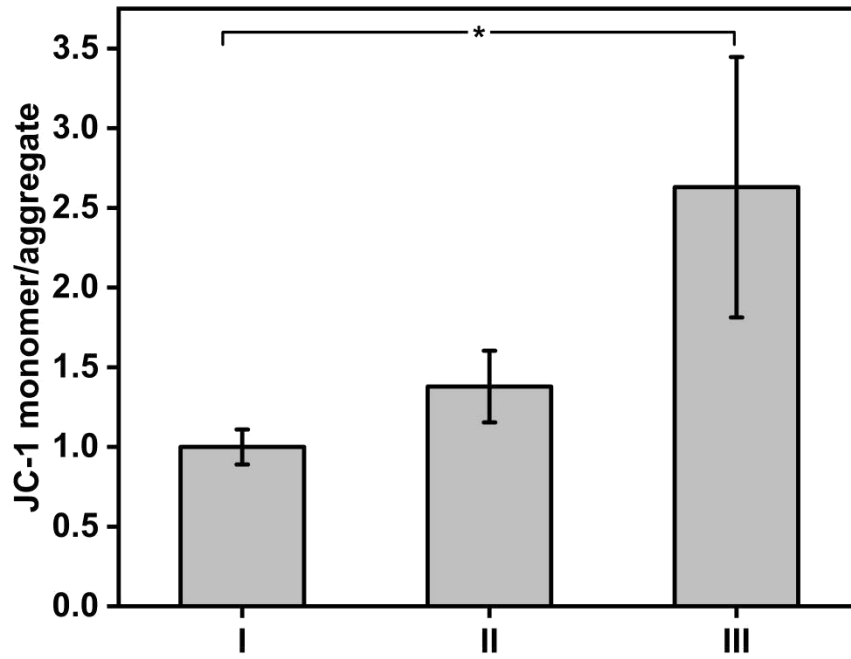

**Figure S6.** Statistical assay of JC-1 monomer/aggregate ratio shown in Figure 4G. I, II, III were indicated saline, GSP-TPPs+laser and GSNP-TPPs+laser, respectively. (n=3, \*p < 0.05)

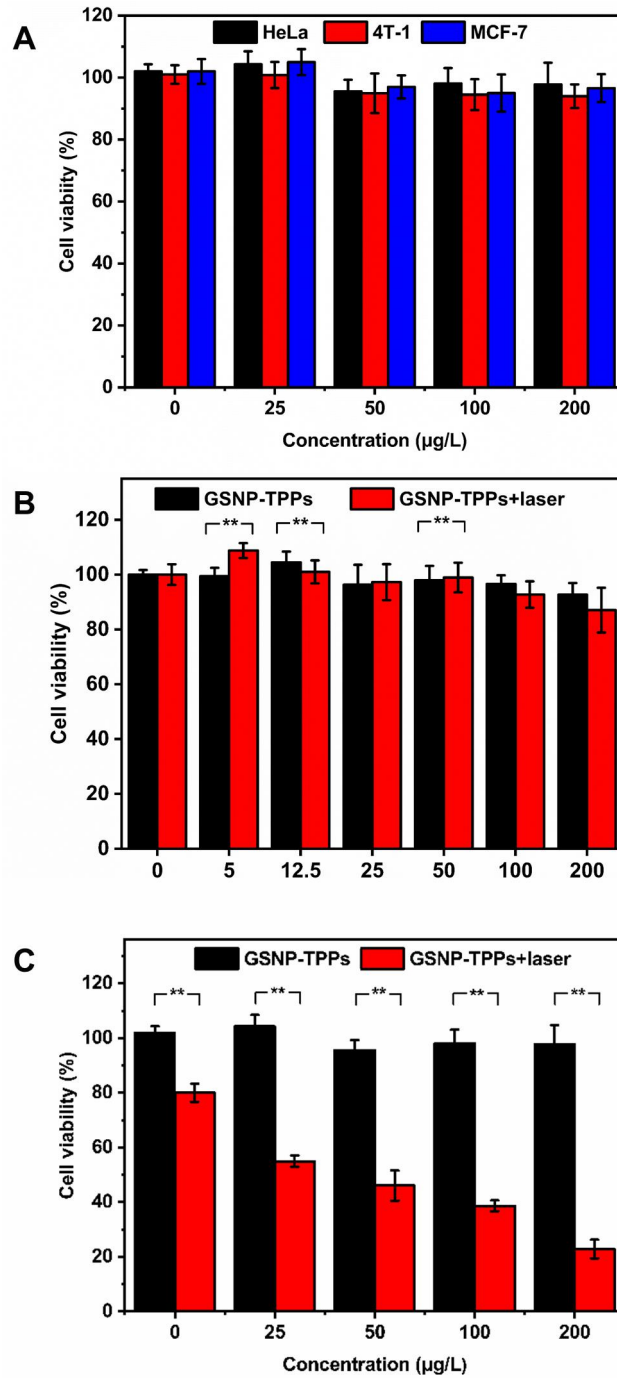

**Figure S7.** A) Cell viability of HeLa, 4T-1 and MCF-7 cells after treatment with various concentrations (0, 25, 50, 100 and 200 µg/mL). B) Cell viability of H9c2 cells after treatment with various concentrations (0, 5, 12.5, 25, 50, 100 and 200 µg/mL). C) Cell viability of HeLa cells after treatment with various



concentrations (0, 25, 50, 100 and 200  $\mu\text{g}/\text{mL}$ ). (n=3, \*\*p < 0.01)

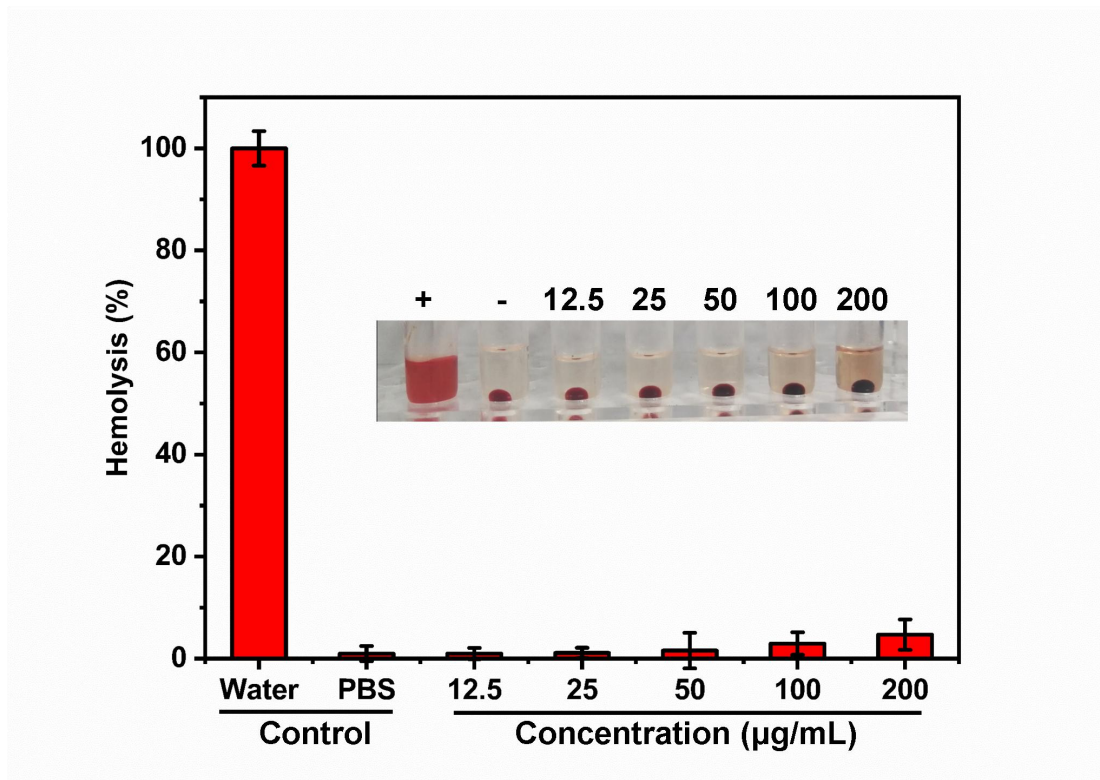

**Figure S8.** In vitro hemolysis assay of GSNP-TPPs. Inset: hemolysis photos after centrifugation.

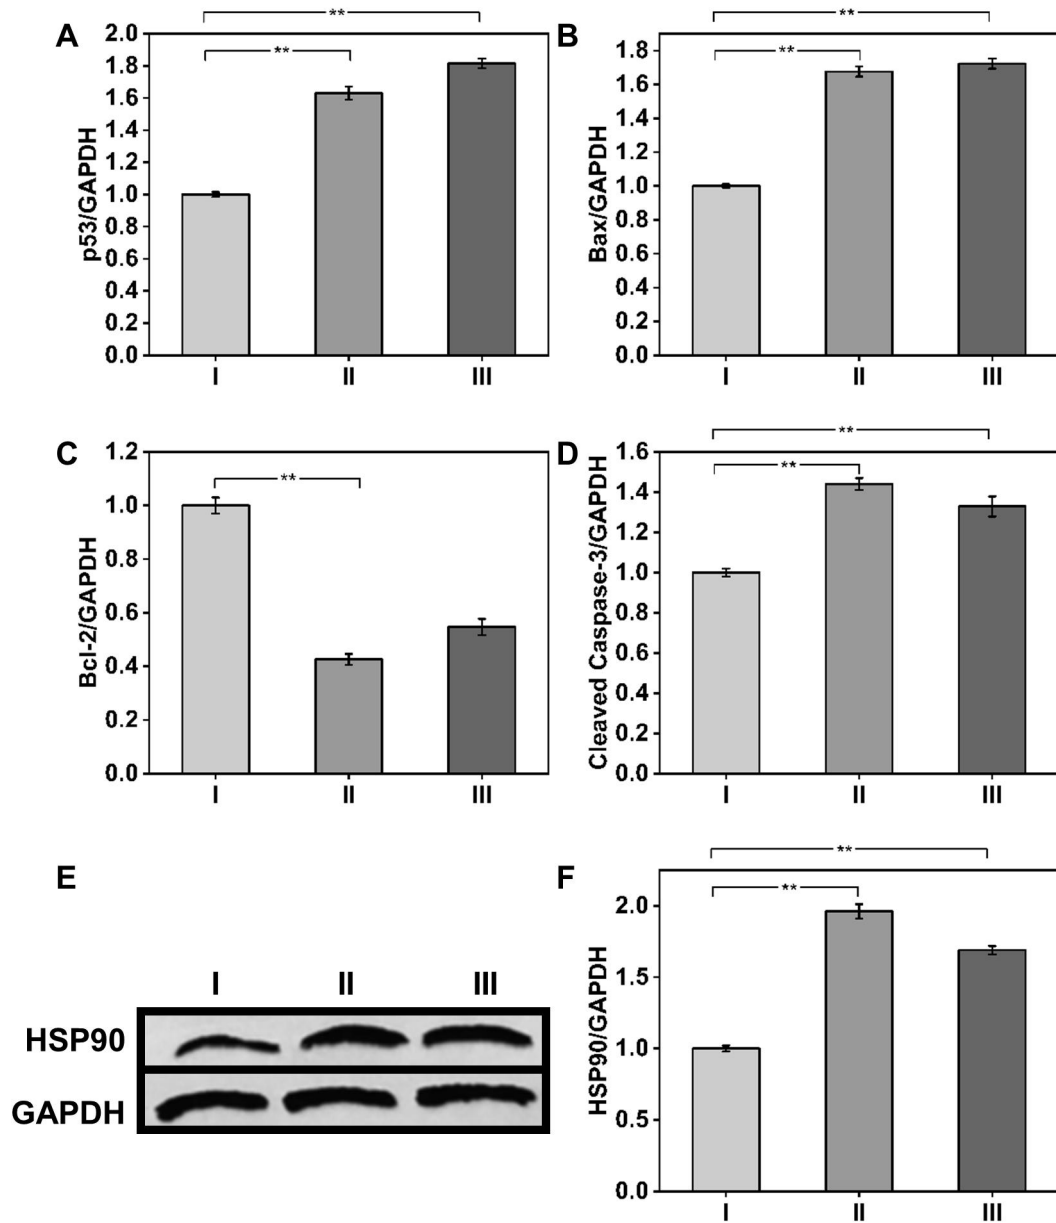

**Figure S9.** A-D, F) Statistical assay of p53, Bax, Bcl-2, Cleaved Caspase-3 and HSP90 contents according to their result of western blot. (n=3, \*\*p < 0.01)

E) Western blot of HSP90 with different treatment: I Control, II GSPs+laser, III GSP-TPPs+laser.

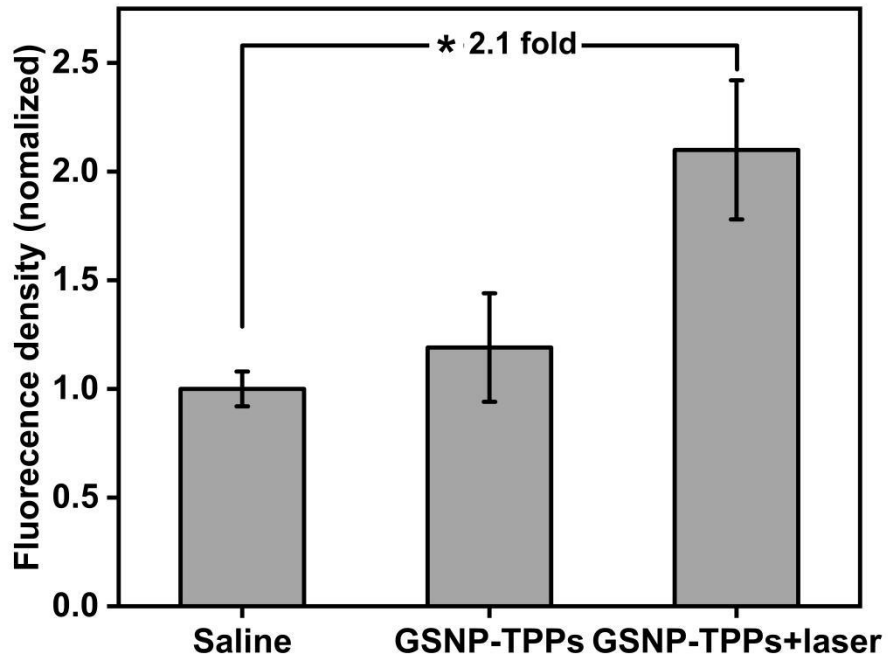

**Figure S10.** Quantitative comparison of the green fluorescence intensity shown in Figure 4H. (n=3, \*p < 0.05)

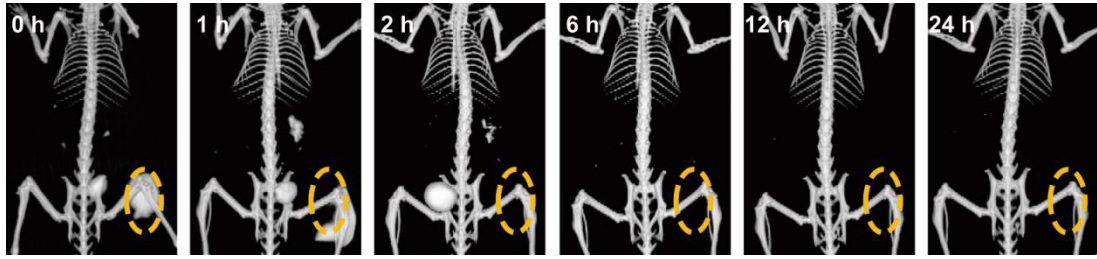

**Figure S11.** In vivo CT images of HeLa tumor-bearing mice after i.v. injection of iopromide solution at different times (0, 1, 2, 6, 12, 24 h).

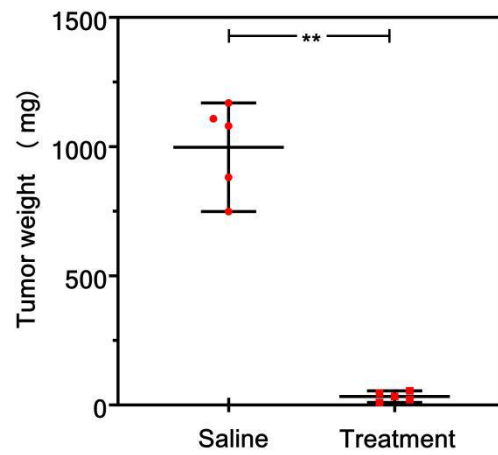

**Figure S12.** Represents the tumor weights in control (saline) and treatment (GSPN-TPPs+laser) groups after removal of the tumor from animals. Each point represents the weight of each tumor and the lines represent the mean value. “\*\*” denotes statistical difference (\*\*p < 0.01).

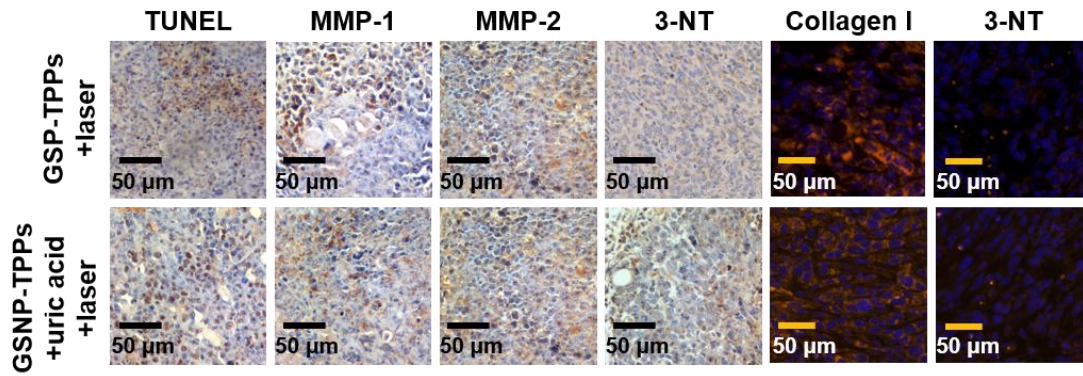

**Figure S13.** TUNEL assay, immunohistochemical and immunofluorescent staining of tumor sections from GSP-TPPs+laser and GSP-TPPs+uric acid+laser groups. Immunohistochemical staining for MMP-1, MMP-2 and 3-NT proteins. Immunofluorescent staining for Collagen I and 3-NT.

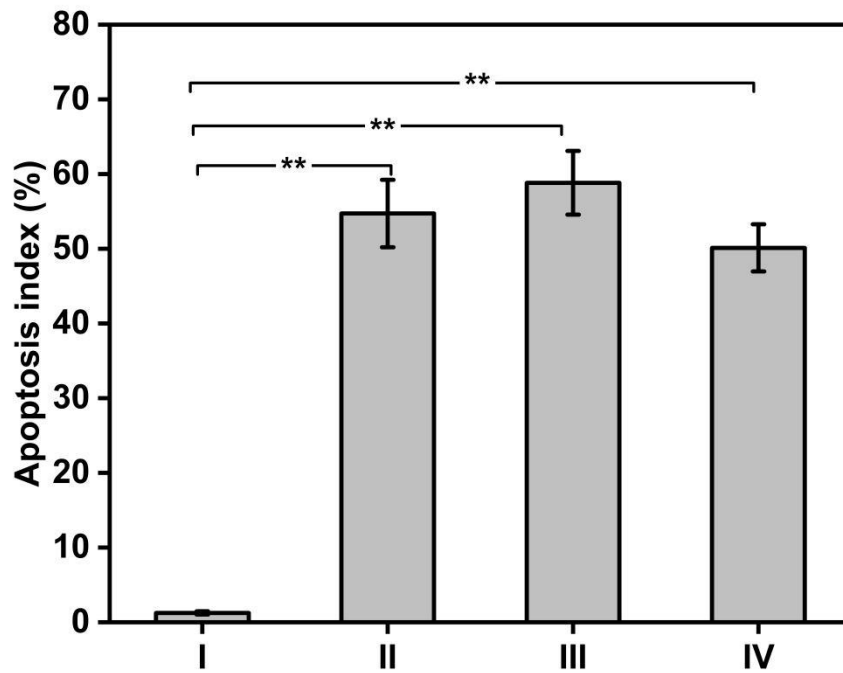

**Figure S14.** Quantification of the percentage of apoptotic cells in the TUNEL assay in Figure 7 and S13. I Control, II GSP-TPPs+laser, III GSNP-TPPs+laser, IV GSNP-TPPs+uric acid+laser. (n=5, \*\*p < 0.01)



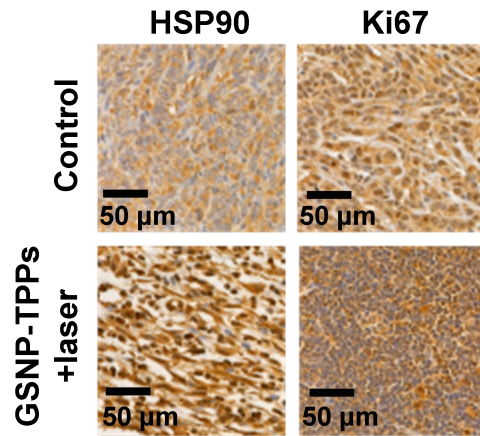

**Figure S15.** Immunohistochemical staining of tumor tissues for HSP90 and Ki67 proteins.

**Table S1.** The brand, catalog number and the dilution for each antibody used

in western blotting

| Antibody             | Brand    | Catalog<br>number | Dilution |
|----------------------|----------|-------------------|----------|
| p53                  | Solarbio | K101293P          | 1: 500   |
| Bcl-2                | Solarbio | K003505P          | 1: 1000  |
| Bax                  | Solarbio | K001593P          | 1: 1200  |
| Cleaved<br>Caspase-3 | SAB      | 29034             | 1: 1200  |
| HSP90                | Solarbio | K106929P          | 1: 500   |
| MMP-1                | Solarbio | K000342P          | 1: 500   |
| MMP-2                | Solarbio | K101302P          | 1: 500   |
| GAPDH                | Solarbio | K200057M          | 1: 1000  |
